# Supplementary material
Source: publisher site journal article supplement (https://www.dovepress.com/article/282108)
Supplement: Supplementary file 1 [file get_supplementary_file.php]

Supplementary Table S1. Prediction ability of the PRISM III score according to several cut-off points

| **Cut-off point for the PRISM III score** | **Sensitivity** | **Specificity** | **Classification ability** | **LR+** | **LR−** |
| --- | --- | --- | --- | --- | --- |
| ≥6 | 100.00 | 27.76 | 39.50 | 1.38 | 0 |
| ≥7 | 96.92 | 46.57 | 54.75 | 1.81 | 0.07 |
| ≥8 | 96.92 | 63.88 | 69.25 | 2.68 | 0.05 |
| ≥9 | 92.31 | 75.52 | 78.25 | 3.77 | 0.10 |
| ≥10 | 89.23 | 93.13 | 92.50 | 13.00 | 0.12 |
| ≥11 | 84.62 | 94.33 | 92.75 | 14.92 | 0.16 |
| ≥12 | 84.62 | 96.12 | 94.25 | 21.80 | 0.16 |
| ≥14 | 78.46 | 98.51 | 95.25 | 52.57 | 0.22 |
| ≥16 | 64.62 | 99.40 | 93.75 | 108.23 | 0.36 |
| ≥17 | 53.85 | 99.40 | 92.00 | 90.19 | 0.46 |
| ≥18 | 50.77 | 100.00 | 92.00 |  | 0.49 |

Supplementary Table S2. Predicted and actual number of deaths based on a logistic regression analysis using a cutoff point of 0.5

|  | **Deceased patients** | **Patients who survived** | **Total number of participants** |  |
| --- | --- | --- | --- | --- |
| **Predicted number of deceased patients** | 43 | 9 | 52 | Positive predictive value = 82.69% |
| **Predicted number of survivors** | 22 | 326 | 348 | Negative predictive value = 93.68% |
| **Total** | 65 | 335 | 400 |  |
|  | Sensitivity = 66.15% | Specificity = 97.31% |  | Classification rate = 92.25% |
